# Supplementary material
Source: publisher figshare collection journal article supplement (https://gsajournals.figshare.com/articles/dataset/_/6085481)
Supplement: Supplementary file 1 [file 1]

## Sheet: Sheet1
#chromosome	position_righft(bp)	markerName	position_left(bp)	NearestGene	pVal	MAF
14	245308	2443-2445	246136	YNL215W	0.000425226	0.413793
12	282090	1994	282090	YLR074C	0.000456527	0.285714
12	282396	1995	282396	YLR074C	0.000557263	0.275862
14	254146	2446-2448	254156	NNL053C	0.00137413	0.37931
12	808624	2133-2136	810884	YLR341W	0.00257411	0.413793
14	235424	2442	235424	YNL220W	0.00295723	0.482759
12	987907	2179	987907	YLR426W	0.00356515	0.413793
12	264910	1990-1991	266101	YLR063W	0.00584082	0.275862
12	956372	2167-2171	956600	YLR417W	0.00614296	0.448276
8	71746	1190-1191	72237	YHL017W	0.00709278	0.482759
12	829267	2144-2146	829707	YLR350W	0.00724024	0.448276
8	80019	1192-1194	80073	YHL012W	0.0081544	0.482759
14	393906	2461-2462	394164	YNL124W	0.0088066	0.448276
7	52613	902	52613	NGL041C	0.00947637	0.482759
14	258593	2449	258593	YNL204C	0.0109157	0.448276
7	3714	874-875	10137	YGL263W	0.0112773	0.482759
3	81832	350-371	92392	YCL022C	0.0144161	0.413793
7	55459	903-904	55465	YGL235W	0.0163567	0.482759
12	317541	1999-2000	317607	YLR088W	0.016589	0.275862
11	421552	1767	421552	YKL010C	0.0171505	0.357143
14	168129	2435	168129	YNL254C	0.0205909	0.448276
3	105047	373	105047	YCL009C	0.0213372	0.448276
12	326211	2002-2003	326983	YLR092W	0.0232055	0.275862
12	990757	2180	990757	YLR428C	0.0237548	0.37931
2	50921	166	50921	YBL089W	0.0238449	0.482759
12	782840	2129	782840	YLR326W	0.0246448	0.448276
1	74575	80	74575	YAL037W	0.0246713	0.448276
16	700284	2908	700284	NPR010W	0.024959	0.344828
13	46070	2220-2221	46084	NML013W	0.0269684	0.413793
10	204436	1541	204436	gJL04	0.0282569	0.448276
7	44996	901	44996	YGL242C	0.0285892	0.482759
14	368181	2459	368181	YNL138W	0.0287139	0.392857
8	128740	1210-1211	130272	YHR011W	0.0296143	0.37931
13	33501	2218	33501	YML118W	0.0309388	0.5
11	403780	1764	403780	NKL001C	0.0313914	0.448276
11	405588	1766	405588	YKL017C	0.0313914	0.448276
11	442830	1768-1769	447047	NKR001C	0.0322026	0.37931
7	15891	886-887	16571	YGL256W	0.0330122	0.482759
7	23129	900	23129	YGL254W	0.0330122	0.482759
3	75021	347	75021	YCL026C	0.0331394	0.392857
14	263967	2450-2452	266801	YNL200C	0.033196	0.482759
15	1065727	2819-2821	1075601	YOR385W	0.033443	0.413793
5	166033	662-663	166039	YER007W	0.034092	0.275862
2	477247	252	477247	NBR023W	0.034536	0.344828
9	19607	1281-1286	19650	YIL171W	0.0362214	0.37931
9	33795	1290-1292	33807	YIL165C	0.0362214	0.37931
3	76128	348	76128	YCL025C	0.0364898	0.37931
14	220949	2441	220949	YNL227C	0.0370941	0.482759
12	849487	2147	849487	NLR127C	0.0377873	0.448276
12	872450	2155-2156	872462	YLR375W	0.0381975	0.482759
3	264131	388-389	264281	YCR087C	0.0404954	0.448276
11	566379	1792	566379	YKR066C	0.0407943	0.464286
7	16619	888-899	21281	gGL01	0.0427745	0.464286
7	69251	905-908	73490	YGL228W	0.0434265	0.482759
12	92675	1962-1964	92679	NLL003W	0.0444591	0.37931
1	192140	102-103	193261	YAR035W	0.0451341	0.448276
2	36373	165	36373	NBL026W	0.0454504	0.482759
12	95640	1967	95640	YLL024C	0.046608	0.344828
10	215076	1542-1543	219101	gJL05	0.0472426	0.413793
12	899900	2159-2160	899948	YLR389C	0.0498303	0.482759
12	912978	2162-2163	912984	YLR397C	0.0498303	0.482759
13	27644	2214-2215	28334	YML121W	0.0501784	0.448276
12	854281	2150-2153	855778	YLR364W	0.0519299	0.482759
12	332573	2004	332573	gLR05	0.053183	0.285714
10	260295	1545-1546	262897	gJL06	0.0536578	0.448276
11	403783	1765	403783	NKL001C	0.0538796	0.464286
11	557094	1790-1791	557298	YKR060W	0.0541122	0.37931
12	108810	1969	108810	YLL018C	0.0555179	0.275862
11	554156	1787-1789	554564	YKR058W	0.0567676	0.413793
4	962702	550-551	962978	YDR251W	0.0572153	0.37931
6	172581	847	172581	YFR014C	0.0576862	0.448276
6	174561	850-852	177332	YFR015C	0.0576862	0.448276
2	29491	162-163	29494	gBL01	0.0577567	0.5
8	518543	1270	518543	YHR208W	0.0581222	0.357143
11	575320	1793	575320	YKR071C	0.0591591	0.482759
14	525065	2474-2475	525068	gNL07	0.0593343	0.321429
14	206187	2439-2440	209853	YNL237W	0.0629574	0.448276
15	7699	2558-2559	7795	YOL164W	0.0637306	0.482759
11	540951	1783-1784	547921	gKR05	0.0637946	0.464286
4	926403	545-546	928754	YDR231C	0.0646234	0.482759
16	744533	2913	744533	NPR020W	0.0657768	0.413793
7	98229	913-924	111783	YGL208W	0.0664108	0.448276
6	172587	848-849	172611	YFR014C	0.0664892	0.482759
14	502319	2472-2473	502499	YNL066W	0.0693365	0.310345
12	553062	2060-2062	553122	YLR205C	0.0731293	0.413793
4	1474476	592-595	1474563	YDR515W	0.073279	0.310345
4	1455128	585-586	1455506	YDR503C	0.0739641	0.344828
7	117898	925	117898	YGL201C	0.074364	0.482759
14	534345	2476	534345	YNL050C	0.0759444	0.344828
15	255002	2666-2668	255014	NOL009W	0.0770239	0.482759
12	909228	2161	909228	YLR394W	0.0775442	0.5
15	683303	2776-2778	690369	YOR186W	0.0821805	0.37931
12	719857	2110	719857	YLR292C	0.0856597	0.413793
15	272023	2670-2671	274227	YOL027C	0.0864719	0.413793
8	56249	1186-1187	56255	NHL003W	0.087962	0.37931
9	415314	1421	415314	YIR032C	0.0959785	0.310345
9	74540	1302-1306	79823	YIL146C	0.0966203	0.482759
9	405133	1418-1419	405139	YIR026C	0.0966462	0.344828
9	27026	1287-1289	31216	NIL022W	0.0982774	0.344828
9	38608	1293	38608	YIL162W	0.0982774	0.344828
14	410247	2464-2466	412275	YNL115C	0.0991557	0.413793
4	1441483	582-584	1443907	YDR496C	0.101428	0.413793
12	611810	2067-2068	611854	YLR235C	0.103098	0.448276
12	86370	1961	86370	YLL028W	0.10311	0.392857
4	1291686	572	1291686	YDR409W	0.103201	0.428571
12	858998	2154	858998	YLR368W	0.103396	0.482759
12	35971	1947	35971	YLL052C	0.105744	0.464286
12	677957	2084	677957	NLR116W	0.106719	0.482759
1	89877	81-82	94466	gAL02	0.107552	0.482759
4	1104927	558-559	1105251	YDR318W	0.108742	0.448276
14	330368	2455-2456	330371	NNL045W	0.109948	0.413793
14	358644	2458	358644	YNL142W	0.109948	0.413793
14	27633	2416-2417	28789	YNL326C	0.110086	0.482759
16	704392	2909	704392	YPR082C	0.110782	0.357143
2	73348	167	73348	YBL080C	0.111762	0.464286
2	401609	238-240	407451	YBR081C	0.11375	0.413793
4	929778	547	929778	YDR233C	0.11521	0.448276
9	61273	1299-1301	69439	YIL150C	0.118999	0.482759
12	388932	2009	388932	YLR121C	0.120172	0.413793
3	259728	387	259728	YCR083W	0.120175	0.464286
16	787288	2917	787288	YPR124W	0.120883	0.464286
15	276469	2672-2673	276475	YOL025W	0.121535	0.37931
12	881580	2157-2158	881904	YLR381W	0.123827	0.448276
7	860473	1052-1055	865581	gGR10	0.126534	0.392857
10	185614	1537	185614	YJL125C	0.128366	0.482759
14	340080	2457	340080	YNL158W	0.128472	0.464286
14	314886	2454	314886	gNL06	0.13247	0.428571
8	293129	1252	293129	YHR095W	0.132704	0.413793
2	74696	168-169	75050	gBL03	0.132881	0.464286
12	582499	2065	582499	YLR223C	0.133817	0.37931
2	481480	258-259	486681	YBR121C	0.135728	0.275862
4	1491113	600-601	1491143	YDR526C	0.137279	0.275862
9	430914	1426-1433	435497	YIR039C	0.138679	0.37931
12	634225	2071-2072	634226	gLR07	0.139167	0.448276
12	380268	2006-2008	381902	YLR115W	0.139172	0.448276
12	659357	2078-2079	662627	YLR257W	0.139708	0.482759
13	64970	2226-2228	69122	gML01	0.142839	0.464286
11	587133	1796	587133	YKR079C	0.144387	0.448276
7	858479	1050-1051	858610	YGR181W	0.144821	0.344828
16	718895	2911-2912	718896	NPR015C	0.145412	0.344828
2	9425	154-161	14291	NBL029W	0.147201	0.482759
9	45863	1294-1295	45866	YIL159W	0.149999	0.37931
14	542652	2477	542652	YNL046W	0.151591	0.37931
4	929904	548	929904	YDR233C	0.15325	0.464286
4	1510882	610-611	1511256	YDR537C	0.154229	0.310345
4	1495579	602	1495579	YDR528W	0.154549	0.310345
8	518913	1271	518913	NHR026C	0.154757	0.413793
15	411902	2703-2704	413169	YOR043W	0.155227	0.464286
15	290670	2676	290670	NOL007C	0.156761	0.413793
12	777814	2128	777814	YLR322W	0.157727	0.392857
13	77684	2229	77684	YML098W	0.15952	0.448276
13	78655	2230	78655	YML097C	0.164359	0.482759
15	298704	2677-2678	298710	YOL015W	0.172303	0.413793
11	591001	1797	591001	YKR080W	0.176461	0.482759
7	880307	1056-1058	881983	YGR190C	0.178498	0.448276
9	397229	1413	397229	YIR020C	0.179415	0.37931
12	254692	1986	254692	YLR056W	0.181377	0.357143
2	479202	253-257	480153	NBR024W	0.183304	0.310345
16	711618	2910	711618	YPR087W	0.185817	0.357143
16	70847	2822-2823	70853	YPL254W	0.186097	0.413793
10	164152	1536	164152	YJL132W	0.186762	0.464286
9	308850	1391-1392	308856	YIL024C	0.188482	0.482759
15	1152	2515-2557	7657	YOL166C	0.190041	0.482759
15	7861	2560-2595	17947	YOL164W	0.190041	0.482759
15	27929	2598	27929	NOL047W	0.190041	0.482759
15	248748	2665	248748	YOL043C	0.192209	0.413793
9	386049	1410	386049	NIR005C	0.195123	0.392857
11	388735	1751-1753	389430	YKL027W	0.197037	0.413793
11	469133	1770	469133	NKR006C	0.197783	0.37931
2	197710	195-196	197712	NBL002C	0.200438	0.482759
5	538880	742	538880	YER174C	0.200663	0.464286
12	733838	2114-2116	744573	YLR303W	0.200882	0.448276
12	55041	1948-1958	66592	gLL01	0.201557	0.37931
4	864550	543-544	878299	YDR206W	0.202645	0.482759
11	527498	1778	527498	NKR007C	0.203642	0.482759
4	17718	391	17718	YDL243C	0.20369	0.413793
15	703771	2779-2784	704065	NOR041W	0.204448	0.448276
6	134102	828	134102	YFL004W	0.204657	0.482759
6	143938	830-833	143978	gFL02	0.204657	0.482759
13	79760	2231-2234	81358	NML009C	0.206596	0.448276
7	92845	910-911	92893	YGL211W	0.207208	0.413793
10	353331	1558	353331	YJL046W	0.207856	0.413793
6	83561	806-808	84405	YFL026W	0.208566	0.37931
3	258274	385-386	258310	YCR081W	0.212023	0.448276
12	748567	2117-2118	748735	YLR308W	0.217472	0.413793
12	762931	2125-2126	766039	YLR314C	0.217472	0.413793
5	183959	664-665	183959	YER014C	0.218738	0.413793
7	141945	943-946	143758	YGL193C	0.219576	0.310345
15	418282	2705-2707	418908	NOR005W	0.221217	0.482759
12	370433	2005	370433	YLR111W	0.223257	0.413793
7	823430	1045-1046	823434	NGR093C	0.224701	0.413793
12	704828	2095-2099	705220	YLR281C	0.2257	0.413793
12	708035	2101-2102	708041	YLR285W	0.2257	0.413793
12	713638	2107-2108	713644	YLR288C	0.2257	0.413793
12	1006717	2183	1006717	YLR435W	0.226173	0.413793
5	200849	679-680	200855	YER022W	0.227756	0.482759
7	833792	1047	833792	YGR168C	0.227995	0.482759
10	40238	1491	40238	YJL208C	0.235769	0.448276
4	1095540	557	1095540	NDR111W	0.241756	0.392857
11	235359	1731	235359	YKL108W	0.241835	0.464286
3	64311	346	64311	YCL032W	0.247007	0.344828
8	46009	1185	46009	YHL029C	0.250276	0.482759
14	418272	2469	418272	YNL110C	0.250748	0.344828
8	5777	1133-1141	7029	NHL007C	0.251672	0.448276
10	96193	1511	96193	YJL173C	0.252637	0.448276
10	124162	1523-1525	131235	YJL157C	0.252637	0.448276
7	940466	1072	940466	YGR222W	0.253628	0.448276
7	940724	1074	940724	YGR222W	0.253628	0.448276
11	523140	1777	523140	YKR044W	0.257168	0.464286
7	900140	1061	900140	YGR200C	0.259649	0.482759
12	238297	1978-1980	239577	YLR046C	0.261152	0.344828
12	516240	2058-2059	516698	YLR180W	0.261801	0.482759
14	33608	2419-2423	38853	YNL322C	0.262533	0.482759
15	379158	2687-2690	382586	YOR025W	0.264835	0.448276
15	384744	2693-2696	392766	YOR029W	0.264835	0.448276
12	642137	2075	642137	YLR252W	0.26673	0.482759
4	1144486	562	1144486	YDR335W	0.268877	0.344828
8	389043	1257-1260	389175	YHR145C	0.269876	0.37931
11	531912	1779-1780	531924	YKR051W	0.271057	0.482759
6	205894	853-855	206164	YFR026C	0.272153	0.413793
10	159751	1533-1535	159781	NJL020C	0.277433	0.448276
12	689211	2089-2092	693616	YLR273C	0.277743	0.448276
12	697260	2094	697260	YLR277C	0.277743	0.448276
13	922269	2410-2411	923512	YMR324C	0.279398	0.37931
16	84943	2824	84943	YPL246C	0.279898	0.310345
4	275192	474-477	282150	YDL103C	0.281282	0.448276
5	530762	739-741	535294	gER07	0.283189	0.482759
15	632884	2774-2775	632896	YOR158W	0.285759	0.448276
11	309290	1743-1745	315611	NKL008W	0.286033	0.482759
10	81871	1501-1502	81877	YJL186W	0.286841	0.482759
9	268353	1383-1384	268413	NIL005W	0.28863	0.448276
7	853755	1048-1049	853869	YGR179C	0.290633	0.37931
2	87850	171	87850	YBL073W	0.292233	0.448276
16	256359	2847	256359	YPL156C	0.29433	0.448276
16	387244	2855	387244	gPL05	0.294731	0.428571
7	128895	926-927	129147	YGL197W	0.295225	0.413793
7	139169	938	139169	YGL195W	0.295225	0.413793
13	124876	2248-2250	130069	YML072C	0.295373	0.482759
14	19885	2413-2415	23220	YNL329C	0.295783	0.413793
8	340249	1256	340249	YHR115C	0.297403	0.482759
11	589	1658	589	YKL225W	0.300118	0.37931
1	134582	84-91	139316	YAL010C	0.300398	0.37931
16	819252	2918-2920	819256	NPR045W	0.301042	0.428571
15	27210	2596-2597	27211	NIL023W	0.301142	0.344828
9	289504	1389	289504	YIL034C	0.303024	0.448276
11	379424	1747	379424	NKL002C	0.307429	0.392857
7	951978	1078-1080	952074	YGR230W	0.307989	0.413793
7	974630	1084-1088	974685	NGR114C	0.307989	0.413793
12	131339	1973	131339	YLL009C	0.312412	0.275862
15	348935	2683	348935	gOR03	0.314441	0.482759
16	252114	2845-2846	252120	YPL158C	0.315288	0.482759
15	779976	2787-2788	780217	YOR235W	0.316096	0.413793
5	222999	685-686	223005	YER035W	0.318845	0.448276
2	217015	203	217015	YBL006C	0.318916	0.482759
4	432487	484-486	433593	YDL011C	0.320173	0.448276
4	802858	538	802858	gDR10	0.320781	0.464286
6	100269	809-811	100377	YFL019C	0.321986	0.464286
12	1014022	2184-2185	1019353	YLR438C	0.324191	0.464286
9	98628	1310-1313	98637	YIL133C	0.3246	0.482759
2	162419	182-184	163085	YBL031W	0.325437	0.448276
11	382910	1748-1750	382916	YKL029C	0.326361	0.37931
5	504718	735-736	504721	NER044C	0.33153	0.482759
14	547075	2478-2479	547076	NNL013C	0.332378	0.482759
10	570519	1621-1622	570657	YJR071W	0.334678	0.310345
7	905023	1062-1063	905024	NGR103C	0.336957	0.482759
7	810528	1044	810528	NGR073W	0.338708	0.392857
4	1489722	599	1489722	YDR524C	0.34417	0.344828
7	167583	947	167583	YGL177W	0.346594	0.344828
4	137411	435-439	141607	YDL180W	0.346964	0.448276
4	304684	481	304684	YDL085W	0.348098	0.428571
4	527451	507-522	527523	YDR038C	0.348356	0.448276
16	182954	2841	182954	YPL192C	0.348519	0.310345
15	802726	2790-2793	808280	YOR251C	0.349451	0.448276
15	842108	2796	842108	SNR31	0.349451	0.448276
15	618870	2772-2773	619864	gOR05	0.35064	0.392857
7	131382	931-937	135422	gGL03	0.352066	0.392857
2	183805	188-194	191208	YBL020W	0.353146	0.448276
9	154736	1323-1324	155030	YIL112W	0.353436	0.448276
10	39595	1490	39595	YJL209W	0.353918	0.413793
4	273841	472-473	273847	YDL104C	0.358032	0.413793
4	297978	480	297978	YDL089W	0.358032	0.413793
4	309626	482	309626	NDL016W	0.358032	0.413793
12	260112	1988-1989	260118	YLR059C	0.358283	0.275862
6	38648	786-787	42341	YFL049W	0.358959	0.448276
5	546668	743	546668	NER046W	0.362247	0.448276
4	1318084	574	1318084	YDR423C	0.363277	0.464286
1	133612	83	133612	YAL011W	0.365439	0.392857
9	362634	1406-1407	362718	YIR003W	0.365707	0.37931
6	226159	858-860	226369	YFR035C	0.366322	0.413793
2	310969	216	310969	YBR037C	0.367496	0.482759
11	623581	1811-1812	624914	gKR06	0.372706	0.428571
5	200735	677-678	200741	YER022W	0.373986	0.482759
4	441064	494-501	463271	YDL005C	0.37544	0.482759
6	232272	862	232272	YFR039C	0.376233	0.482759
10	87115	1508	87115	YJL181W	0.377735	0.482759
4	369368	483	369368	NDL012C	0.378713	0.448276
11	482431	1771-1772	485188	YKR022C	0.380367	0.448276
14	486864	2471	486864	YNL074C	0.380748	0.344828
3	301453	390	301453	YCR100C	0.385156	0.482759
10	122615	1522	122615	YJL158C	0.388168	0.464286
10	698460	1652	698460	YJR143C	0.389212	0.413793
10	388197	1562	388197	YJL030W	0.39012	0.37931
16	408888	2856	408888	NPL010C	0.390625	0.428571
11	263970	1738	263970	YKL094W	0.395762	0.482759
7	311767	961	311767	YGL103W	0.40194	0.392857
14	558288	2484	558288	YNL037C	0.402107	0.37931
14	577303	2489-2494	591238	YNL029C	0.402107	0.37931
2	380966	231-233	380978	YBR071W	0.403581	0.37931
1	184253	96	184253	YAR027W	0.407567	0.413793
4	1418660	581	1418660	YDR481C	0.408558	0.37931
13	437168	2326	437168	YMR084W	0.412751	0.482759
9	341219	1405	341219	YIL009W	0.415972	0.448276
8	224266	1251	224266	YHR063C	0.420079	0.482759
13	371858	2312-2313	378624	gMR06	0.422952	0.482759
4	1310391	573	1310391	gDR13	0.425337	0.428571
15	715811	2785	715811	YOR196C	0.426067	0.482759
16	280630	2850	280630	YPL144W	0.430587	0.5
3	240273	383	240273	YCR071C	0.431221	0.413793
14	571889	2487-2488	571969	YNL034W	0.431989	0.413793
10	76841	1500	76841	YJL187C	0.432458	0.482759
10	85262	1503-1506	85488	YJL183W	0.432458	0.482759
1	154331	94-95	166225	YAR002C	0.435634	0.344828
16	618580	2904-2906	620601	YPR026W	0.43844	0.310345
7	919660	1071	919660	NGR104C	0.438513	0.5
15	59734	2618	59734	YOL140W	0.439032	0.464286
6	70819	799-800	71011	gFL01	0.443995	0.413793
6	75461	802	75461	YFL031W	0.443995	0.413793
15	846349	2799-2800	850124	YOR281C	0.444294	0.413793
4	812954	539	812954	NDR055C	0.444508	0.448276
16	927505	2926-2928	927511	NPR090C	0.445193	0.37931
10	393559	1565-1566	393565	YJL026W	0.447049	0.344828
8	399408	1261	399408	YHR151C	0.449782	0.344828
16	207357	2843	207357	YPL180W	0.449789	0.392857
14	689582	2502-2503	689942	YNR033W	0.453018	0.37931
10	43261	1492	43261	gJL02	0.453853	0.482759
10	34086	1487-1488	34098	YJL212C	0.453864	0.482759
4	509817	505-506	509823	YDR034C	0.455345	0.448276
13	180103	2258-2262	184113	YML048W	0.456012	0.448276
15	89212	2620	89212	YOL123W	0.458846	0.482759
7	177153	949-953	187563	gGL04	0.459772	0.37931
16	420446	2857	420446	YPL071C	0.460324	0.428571
16	486641	2880	486641	YPL035C	0.461892	0.5
12	1023796	2186-2187	1023801	YLR444C	0.464863	0.448276
3	43867	343-344	43879	YCL047C	0.464918	0.344828
10	325804	1548	325804	YJL059W	0.465716	0.413793
4	154435	442-443	155453	gDL02	0.471651	0.482759
8	221932	1250	221932	YHR061C	0.475866	0.448276
12	607076	2066	607076	YLR232W	0.47611	0.428571
15	889472	2811	889472	YOR305W	0.478785	0.448276
5	251263	710-713	251648	NER016C	0.479201	0.413793
9	334198	1403-1404	334246	YIL011W	0.479289	0.482759
16	239628	2844	239628	YPL164C	0.480817	0.448276
8	185021	1241	185021	YHR039C	0.48101	0.344828
8	188680	1242-1243	188860	YHR040W	0.484422	0.37931
15	143598	2646-2648	150652	YOL093W	0.484422	0.482759
15	43053	2603-2607	43219	NOL043W	0.488314	0.482759
10	571065	1623	571065	YJR072C	0.490705	0.344828
13	597706	2378-2379	597712	YMR168C	0.491057	0.275862
2	716926	329	716926	YBR249C	0.491536	0.357143
4	1321561	575	1321561	YDR425W	0.49283	0.413793
15	469463	2725-2728	472577	YOR076C	0.496656	0.448276
11	229397	1729-1730	229409	YKL110C	0.49754	0.482759
8	549639	1279-1280	549643	gHR08	0.499239	0.5
16	890903	2922-2923	890909	YPR175W	0.501447	0.482759
7	402982	978-979	403099	YAR031W	0.501499	0.344828
7	712004	1033	712004	NGR058C	0.504355	0.448276
10	342007	1554-1555	345363	YJL051W	0.50536	0.448276
5	29073	628	29073	YEL065W	0.506789	0.310345
5	500788	733-734	500794	YER162C	0.508624	0.448276
6	48217	796-797	48223	NFL010C	0.509405	0.413793
11	354825	1746	354825	YKL045W	0.511247	0.448276
12	210538	1977	210538	YLR034C	0.512826	0.310345
10	56788	1494	56788	YJL200C	0.514089	0.482759
13	159533	2252	159533	YML058W	0.519101	0.448276
2	343971	222	343971	YBR054W	0.520139	0.413793
4	1022773	555	1022773	NDR107W	0.52245	0.482759
9	272373	1385-1386	274200	YIL045W	0.523473	0.448276
16	199881	2842	199881	YPL183C	0.524803	0.344828
7	256950	958	256950	YGL134W	0.524836	0.448276
10	622074	1643	622074	YJR103W	0.534555	0.344828
7	705703	1030	705703	YGR109C	0.536672	0.392857
11	599534	1800	599534	YKR085C	0.537288	0.448276
2	227327	204	227327	gBL05	0.54015	0.428571
5	549371	744	549371	YER179W	0.540225	0.448276
12	27765	1946	27765	YLL056C	0.540764	0.464286
15	445655	2721	445655	YOR063W	0.540768	0.448276
15	1031503	2816-2818	1031665	YOR371C	0.541867	0.448276
10	582003	1634	582003	YJR082C	0.542103	0.344828
9	372096	1409	372096	gIR04	0.551719	0.344828
2	252577	211-213	252679	YBR008C	0.553095	0.448276
15	170946	2651-2652	174365	gOL02	0.556186	0.482759
12	246578	1981	246578	YLR051C	0.557002	0.321429
7	787749	1034-1037	790863	YGR148C	0.557031	0.413793
14	553121	2481-2483	554610	NNL012W	0.558045	0.413793
16	368091	2853	368091	YPL095C	0.562319	0.413793
15	481586	2730	481586	YOR084W	0.568784	0.428571
2	760471	339	760471	YBR278W	0.569003	0.413793
9	283469	1388	283469	YIL037C	0.571504	0.428571
4	1400044	578	1400044	YDR470C	0.571949	0.37931
15	945790	2814	945790	YOR334W	0.576316	0.413793
4	1149771	563	1149771	NDR132C	0.576501	0.357143
7	1048156	1097	1048156	YGR278W	0.576704	0.428571
4	555048	523	555048	YDR049W	0.576811	0.428571
13	718931	2385-2386	727058	YMR224C	0.580234	0.413793
4	211611	459	211611	YDL139C	0.582894	0.464286
11	258601	1736	258601	YKL097C	0.583235	0.482759
11	266375	1739-1741	273015	YKL092C	0.583235	0.482759
8	149345	1216-1222	150339	YHR021W	0.584208	0.310345
8	154234	1225-1227	155187	gHR03	0.584208	0.310345
10	68086	1498	68086	YJL196C	0.586037	0.448276
15	937045	2813	937045	YOR329C	0.588387	0.37931
2	328529	217	328529	YBR045C	0.589389	0.482759
16	533287	2893-2895	535984	YPL012W	0.590676	0.344828
4	1039388	556	1039388	YDR290W	0.594065	0.428571
4	201394	457	201394	YDL143W	0.594408	0.448276
4	217351	460-464	219126	NDL024W	0.594408	0.448276
13	149075	2251	149075	YML061C	0.595308	0.482759
15	747545	2786	747545	YOR216C	0.601397	0.310345
12	423788	2010	423788	YLR140W	0.603538	0.464286
2	737572	332	737572	YBR263W	0.608168	0.413793
13	379434	2314-2315	379629	gMR06	0.611033	0.428571
9	205636	1334-1336	205639	NGR052C	0.611254	0.413793
12	644082	2076-2077	644136	YLR253W	0.615827	0.448276
6	253708	871-873	264001	YFR053C	0.619099	0.448276
12	760764	2123	760764	YLR313C	0.619295	0.37931
9	296454	1390	296454	YIL030C	0.620066	0.464286
10	36810	1489	36810	YJL211C	0.623886	0.448276
14	614346	2498-2499	618551	YNL010W	0.624925	0.37931
5	25912	626-627	25918	YEL068C	0.628616	0.37931
7	994483	1090-1092	995897	NGR116C	0.630011	0.448276
13	686207	2382	686207	YMR209C	0.630036	0.482759
5	193877	666	193877	YER019W	0.630183	0.448276
5	553227	745-748	560027	YER182W	0.630403	0.482759
15	930119	2812	930119	YOR326W	0.633602	0.413793
12	705226	2100	705226	YLR282C	0.63441	0.37931
2	163277	185-186	165729	YBL030C	0.637201	0.413793
16	462651	2879	462651	YPL049C	0.640915	0.464286
14	61470	2424	61470	YNL304W	0.643414	0.482759
10	453324	1580	453324	YJR008W	0.644462	0.448276
15	47953	2615-2616	48337	YOL147C	0.645358	0.448276
4	843667	542	843667	YDR192C	0.645572	0.448276
11	629977	1813-1814	629980	YKR096W	0.648784	0.37931
8	410845	1262-1264	410989	NHR019C	0.650476	0.310345
12	19609	1942	19609	YLL061W	0.650553	0.5
11	619003	1807-1808	619005	NKR010W	0.651713	0.37931
12	195530	1975-1976	196849	YLR026C	0.653385	0.275862
4	246739	467	246739	YDL119C	0.656857	0.37931
5	511798	737	511798	YER165W	0.657042	0.428571
16	453441	2876-2877	453447	YPL056C	0.660922	0.464286
6	5852	766-767	5853	NFL013C	0.662617	0.448276
6	15106	775	15106	YFL056C	0.662617	0.448276
2	739892	333	739892	YBR266C	0.665497	0.464286
16	125271	2835-2838	128688	YPL226W	0.667404	0.344828
13	697900	2383	697900	YMR215W	0.670025	0.482759
10	704979	1655-1656	715565	YJR147W	0.670033	0.448276
13	216022	2266-2267	216028	YML031W	0.670288	0.448276
15	563945	2756	563945	YOR127W	0.672538	0.413793
15	571107	2758-2763	572412	NOR011W	0.672538	0.413793
13	564143	2372-2376	574721	YMR152W	0.672594	0.310345
16	84949	2825	84949	YPL246C	0.678726	0.357143
16	932315	2929-2931	932543	YPR196W	0.678891	0.344828
14	731638	2513-2514	732034	YNR056C	0.685197	0.482759
4	263771	471	263771	YDL111C	0.68537	0.37931
13	328866	2307	328866	YMR029C	0.686894	0.5
4	143909	440	143909	YDL176W	0.68808	0.464286
15	202371	2660-2663	210840	YOL067C	0.693794	0.37931
13	824809	2389	824809	YMR279C	0.698173	0.428571
15	587258	2766-2767	587318	YOR139C	0.702834	0.482759
15	384696	2691-2692	384702	YOR029W	0.703664	0.482759
2	138517	175-177	138685	YBL042C	0.704429	0.482759
13	535360	2362	535360	YMR132C	0.70617	0.344828
10	472459	1598	472459	NJR009W	0.708304	0.464286
10	500166	1602	500166	YJR035W	0.708304	0.464286
11	79180	1675-1678	85475	YKL193C	0.708758	0.448276
3	177075	374-377	179122	NCR015C	0.70963	0.448276
5	422615	725	422615	NER037W	0.710109	0.285714
13	390352	2318-2320	391768	YMR058W	0.717647	0.482759
1	41482	68	41482	YAL056W	0.717786	0.344828
14	89163	2425-2428	89171	NNL073W	0.719372	0.482759
16	825436	2921	825436	YPR146C	0.720445	0.428571
4	1344561	576-577	1344681	YDR441C	0.721248	0.413793
4	1272748	570	1272748	YDR401W	0.724686	0.413793
13	195863	2263-2264	203101	gML04	0.73077	0.482759
2	301711	215	301711	YBR032W	0.735082	0.482759
13	503714	2351-2354	503728	NMR036C	0.735589	0.448276
13	245457	2282-2286	245674	YML013W	0.740659	0.413793
13	205921	2265	205921	YML036W	0.742942	0.5
14	694768	2506-2507	695117	YNR036C	0.743578	0.413793
13	922257	2406-2409	922262	YMR324C	0.743748	0.413793
11	136395	1692-1702	147884	NKL033C	0.744388	0.482759
15	220339	2664	220339	YOL058W	0.746139	0.357143
5	225484	687-689	225490	NER009C	0.746279	0.482759
7	490789	1009	490789	YGL004C	0.747379	0.428571
9	190797	1325-1328	191494	YIL092W	0.747673	0.448276
11	129845	1690	129845	YKL171W	0.749813	0.448276
11	238667	1732	238667	YKL106W	0.752422	0.482759
11	17679	1664	17679	YKL218C	0.75395	0.37931
7	1057544	1099	1057544	NGR125W	0.755502	0.428571
2	368099	225	368099	YBR064W	0.756673	0.413793
5	312676	716	312676	YER076C	0.756733	0.310345
6	33334	784-785	33688	YFL050C	0.759281	0.482759
13	513779	2361	513779	YMR123W	0.762706	0.344828
13	843356	2390-2391	843590	gMR11	0.76458	0.464286
8	209175	1247-1248	209253	YHR050W	0.767363	0.413793
3	228133	382	228133	YCR064C	0.767792	0.448276
8	193184	1244	193184	YHR043C	0.76796	0.357143
15	108578	2631-2637	113270	YOL111C	0.768034	0.448276
15	132424	2639	132424	YOL099C	0.768034	0.448276
13	243624	2281	243624	YML014W	0.773066	0.392857
4	782121	537	782121	YDR164C	0.776103	0.464286
11	125457	1689	125457	YKL173W	0.782343	0.482759
14	109529	2433	109529	YNL280C	0.782659	0.428571
14	96323	2429-2432	104800	YNL285W	0.783673	0.482759
10	468899	1586	468899	YJR021C	0.78767	0.428571
5	6335	621-622	13213	YEL074W	0.790992	0.310345
3	201174	378-379	201175	YCR041W	0.791429	0.464286
12	1067090	2205-2207	1067093	YLR465C	0.797625	0.310345
15	571105	2757	571105	NOR011W	0.798936	0.428571
16	90762	2827-2828	100527	YPL242C	0.800095	0.310345
16	511404	2890-2891	511410	YPL021W	0.800597	0.413793
12	433954	2011-2012	433957	NLR028W	0.803485	0.482759
10	307482	1547	307482	YJL071W	0.80428	0.482759
9	277909	1387	277909	YIL040W	0.80789	0.428571
13	907437	2401-2405	910742	YMR316C	0.808582	0.448276
5	420599	724	420599	YER129W	0.809046	0.275862
10	584588	1635-1637	586623	YJR084W	0.809679	0.37931
4	1240166	568-569	1240256	YDR383C	0.811282	0.392857
15	44484	2608-2610	44490	YOL150C	0.812463	0.482759
15	44550	2613-2614	44552	YOL150C	0.812463	0.482759
10	647222	1651	647222	YJR120W	0.813432	0.37931
16	318069	2851	318069	YPL123C	0.818536	0.482759
10	601106	1639-1641	604787	gJR12	0.819284	0.413793
7	431862	1002-1003	431868	YGL035C	0.822176	0.392857
4	720997	532-533	723162	YDR133C	0.823123	0.482759
4	262797	470	262797	YDL112W	0.833736	0.413793
11	25989	1667-1668	31186	YKL216W	0.833908	0.37931
16	428617	2858	428617	YPL065W	0.835534	0.482759
16	445377	2875	445377	NPL002C	0.835534	0.482759
11	9261	1659	9261	YKL220C	0.837165	0.321429
10	399125	1567-1569	404817	YJL021C	0.838981	0.413793
10	464573	1585	464573	YJR016C	0.838981	0.413793
13	649251	2380-2381	649254	YMR192W	0.840124	0.392857
13	430165	2325	430165	YMR081C	0.841274	0.448276
7	529382	1017	529382	YGR022C	0.842176	0.482759
7	402836	964-969	402856	YGL053W	0.842475	0.344828
7	403515	984	403515	YGL052W	0.842475	0.344828
7	425448	1000	425448	YGL038C	0.842475	0.344828
16	90266	2826	90266	YPL243W	0.845022	0.321429
8	203255	1245	203255	NHR011W	0.851324	0.37931
10	492566	1601	492566	YJR033C	0.851422	0.464286
6	242889	868	242889	YFR045W	0.85152	0.5
11	171769	1704-1706	174009	YKL147C	0.853242	0.482759
8	151823	1223-1224	152941	gHR03	0.85512	0.344828
5	426432	726	426432	gER03	0.860514	0.285714
10	578427	1629-1631	580698	NJR013W	0.864074	0.310345
15	488274	2731-2736	488373	YOR087W	0.864362	0.413793
2	372549	227	372549	YBR067C	0.865537	0.357143
5	5393	613-616	5396	YEL076W-C	0.865638	0.413793
15	193912	2659	193912	YOL073C	0.867883	0.5
4	573406	526-527	580378	YDR060W	0.868516	0.448276
13	482267	2344	482267	NMR029W	0.869475	0.5
16	523455	2892	523455	gPL09	0.869506	0.428571
6	232278	863-864	234362	YFR039C	0.871735	0.482759
8	441790	1268	441790	YHR168W	0.875281	0.37931
13	255486	2287-2288	255564	YML007W	0.875457	0.37931
13	298182	2299-2305	298194	SNR74	0.875457	0.37931
5	40306	631	40306	YEL060C	0.881756	0.37931
15	461652	2723	461652	YOR072W	0.884555	0.448276
7	427479	1001	427479	YGL037C	0.889293	0.321429
2	732127	330-331	732133	YBR259W	0.891931	0.413793
5	44605	634-635	44611	YEL058W	0.892999	0.310345
11	12705	1660-1662	13040	gKL01	0.900234	0.357143
13	885665	2400	885665	gMR12	0.901402	0.428571
13	855629	2398-2399	855635	YMR293C	0.905426	0.448276
12	1031686	2188-2191	1039506	YLR449W	0.905588	0.413793
12	1054283	2194-2195	1054307	YLR455W	0.905588	0.413793
13	789461	2387-2388	789467	YMR260C	0.907906	0.482759
11	218734	1719-1727	221748	YKL119C	0.908712	0.448276
13	496639	2349	496639	YMR114C	0.9104	0.5
11	612937	1802-1806	613147	YKR092C	0.914461	0.413793
11	42737	1669-1671	46632	YKL209C	0.920865	0.482759
13	227254	2268-2269	229366	YML023C	0.932949	0.413793
7	682395	1026	682395	NGR049W	0.933295	0.448276
8	430123	1265	430123	YHR165C	0.934998	0.413793
3	210756	381	210756	YCR047C	0.93545	0.464286
7	592989	1023	592989	YGR051C	0.938455	0.464286
16	590627	2900	590627	YPR015C	0.938491	0.321429
14	701568	2508	701568	YNR042W	0.941681	0.482759
10	22213	1449-1486	28306	YJL218W	0.944054	0.482759
4	1185641	565-566	1188873	YDR354W	0.946069	0.37931
13	480709	2329-2330	480715	NMR025W	0.950229	0.482759
13	492202	2345	492202	NMR032C	0.950229	0.482759
13	498751	2350	498751	YMR115W	0.950229	0.482759
10	535623	1613	535623	YJR053W	0.950365	0.448276
10	548487	1618-1619	548489	NJR011W	0.950365	0.448276
5	483543	731	483543	YER156C	0.955077	0.413793
10	572785	1624-1625	572791	YJR073C	0.958608	0.275862
16	542300	2896-2897	542312	YPL007C	0.960145	0.275862
2	133774	172-174	133786	NBL017W	0.962145	0.448276
2	750881	337-338	754102	YBR274W	0.964507	0.413793
12	450040	2013-2019	450049	NLR032W	0.967495	0.413793
4	183008	449-453	184213	YDL152W	0.967642	0.482759
10	470604	1588-1589	470610	YJR024C	0.969063	0.482759
10	503342	1603-1605	503778	YJR037W	0.969063	0.482759
5	272257	714-715	272260	NER019W	0.969109	0.37931
4	253396	469	253396	YDL116W	0.972825	0.37931
14	648791	2500	648791	YNR012W	0.97293	0.344828
2	352297	223	352297	YBR057C	0.973868	0.37931
16	497429	2886	497429	YPL029W	0.974505	0.482759
5	42414	632-633	42420	YEL059C	0.975403	0.344828
15	515919	2744-2745	515925	YOR101W	0.97585	0.482759
6	57455	798	57455	YFL037W	0.979434	0.428571
7	436061	1004	436061	YGL033W	0.981475	0.428571
4	251014	468	251014	YDL117W	0.982062	0.413793
7	1058951	1100-1101	1058952	NGR126C	0.982214	0.413793
15	551821	2755	551821	YOR121C	0.982676	0.448276
5	240106	700	240106	YER045C	0.984949	0.5
7	301133	959-960	301815	YGL111W	0.986862	0.448276
13	554837	2363-2364	554843	YMR145C	0.989203	0.275862
13	562908	2371	562908	YMR151W	0.989203	0.275862
9	214485	1372	214485	YIL078W	0.989263	0.482759
7	449902	1005	449902	YGL024W	0.990136	0.413793
7	497765	1010	497765	YGR001C	0.990136	0.413793
12	1043091	2193	1043091	gLR14	0.995	0.392857
11	114410	1687	114410	YKL177W	0.995822	0.464286
3	209940	380	209940	YCR046C	0.996641	0.413793
7	524222	1016	524222	YGR017W	0.997176	0.448276
2	769149	340-341	773198	YBR283C	0.997416	0.448276
